# Supplementary material
Source: MDPI journal article supplement (https://www.mdpi.com/2073-4433/13/3/450)
Supplement: s1 [file s1]

# Supplementary Materials: Low-Dose Benzene Exposure Monitoring of Oil Refinery Workers: Inhalation and Biomarkers

Stefano Dugheri <sup>1,\*</sup>, Giulia Pizzella <sup>2</sup>, Nicola Mucci <sup>3</sup>, Alessandro Bonari <sup>4</sup>, Giovanni Cappelli <sup>3</sup>, Mario Santillo <sup>5</sup>, Iacopo Rainaldi <sup>5</sup>, Ilenia Pompilio <sup>4</sup>, Maria Carrara <sup>6</sup>, Venerando Rapisarda <sup>7</sup>, Simone De Sio <sup>8</sup> and Giulio Arcangeli <sup>3</sup>



UNIVERSITÀ  
DEGLI STUDI  
FIRENZE  
DIPARTIMENTO DI  
MEDICINA SPERIMENTALE  
E CLINICA

BIOLOGICAL MONITORING  
OF THE PROFESSIONAL  
EXPOSURE TO BENZENE  
QUESTIONNAIRE



UNIVERSITÀ  
DEGLI STUDI  
FIRENZE  
DIPARTIMENTO DI  
MEDICINA SPERIMENTALE  
E CLINICA

BIOLOGICAL MONITORING  
OF THE PROFESSIONAL  
EXPOSURE TO BENZENE  
QUESTIONNAIRE

---

SAMPLE N° \_\_\_\_\_

SAMPLING DATE: \_\_\_\_/\_\_\_\_/\_\_\_\_

**Personal data and worker employment data:**

FIRST NAME: \_\_\_\_\_ LAST NAME: \_\_\_\_\_ DATE OF BIRTH: \_\_\_\_/\_\_\_\_/\_\_\_\_

GENDER (M o F) \_\_\_\_\_ BODY WEIGHT (kg) \_\_\_\_\_ HEIGHT (cm) \_\_\_\_\_

TASK: \_\_\_\_\_ AREA: \_\_\_\_\_

INDIVIDUAL PROTECTION DEVICES CURRENTLY IN USE:

NO ☐

YES ☐ SPECIFY WHICH: ☐ GLOVES ☐ MASK ☐ BOOTS ☐ WAXED SUIT/LAB COAT  
☐ OTHER (TO SPECIFY): \_\_\_\_\_

---

**Unnecessary habits and other exposure conditions:**

➤ SMOKE: ☐ NO ☐ YES IF YES, TO SPECIFY THE NUMBER OF CIGARS/CIGARETTES DURING THE WORKSHIFT  
N. \_\_\_\_\_ TYPE \_\_\_\_\_ FOR A TOTAL PER DAY OF N. \_\_\_\_\_ APPROXIMATELY.

➤ PASSIVE SMOKE EXPOSURE: ☐ NO ☐ YES

➤ STOPOVER IN FUEL REFUELING STATIONS (in the last 48 hours): ☐ NO ☐ YES

IF YES TO SPECIFY: ☐ REFUELING SERVED ☐ SELF REFUELING ☐ ONLY STOPOVER

FUEL TYPE: ☐ PETROL ☐ DIESEL ☐ LPG ☐ METHANE

---

**Food intake (in the last 24 hours):**

• **Generic foods (with possible presence of sorbic acid)**

|                                                    |                                                                     |                                                     |
|----------------------------------------------------|---------------------------------------------------------------------|-----------------------------------------------------|
| <input type="checkbox"/> FRESH AND AGED CHEESES    | <input type="checkbox"/> YOGURT                                     | <input type="checkbox"/> OILS (excluding olive oil) |
| <input type="checkbox"/> MARGARINE                 | <input type="checkbox"/> ALCOHOL-FREE DRINKS (FRUIT JUICES)         | <input type="checkbox"/> MAYONNAISE                 |
| <input type="checkbox"/> JAMS                      | <input type="checkbox"/> FRESH PASTA (TORTELLINI, RAVIOLI, GNOCCHI) | <input type="checkbox"/> PACKAGED DRY PASTA         |
| <input type="checkbox"/> PASTRY PRODUCTS/BISCUITRY | <input type="checkbox"/> WHITE WINE                                 | <input type="checkbox"/> RED WINE                   |
| <input type="checkbox"/> SPARKLING WINE            |                                                                     |                                                     |

• **Specific foods (containing sorbic acid as indicated by the manufacturer):**

|                                                     |                                                         |                                                            |
|-----------------------------------------------------|---------------------------------------------------------|------------------------------------------------------------|
| <input type="checkbox"/> PROVOLONE DOLCE AURIOCCHIO | <input type="checkbox"/> PROVOLONE PICCANTE AURIOCCHIO  | <input type="checkbox"/> KETCH-UP MATO MATOKRAFT           |
| <input type="checkbox"/> FORMAGGIO CAMOSCIO D'ORO   | <input type="checkbox"/> MAIONESE KRAFT LEGGERA         | <input type="checkbox"/> MAIONESE SALVAURO                 |
| <input type="checkbox"/> MAIONESE KRAFT             | <input type="checkbox"/> MARGARINA COOPVALLE OMEGA 3    | <input type="checkbox"/> VALLE LEGGERAVALLE-BURROMARGARINA |
| <input type="checkbox"/> SALVAURO                   | <input type="checkbox"/> GNOCCHI FRESCHI GIOVANNI RANA  | <input type="checkbox"/> GNOCCHI RIPIENI GIOVANNI RANA     |
| <input type="checkbox"/> GNOCCHI SALVAURO           | <input type="checkbox"/> GNOCCHI COOPARANCATA E SELUNGA | <input type="checkbox"/> ARANCATA AMSURA                   |
| <input type="checkbox"/> ARANCATA AMARA COOP        | <input type="checkbox"/> ARANCATA SENZA ZUCCHERO COOP   | <input type="checkbox"/> BIRTA POMPELMO SALVAURO           |
| <input type="checkbox"/> SCHWEPPES GUSTO LIMONE     | <input type="checkbox"/> SCHWEPPES GUSTO ARANCIO        | <input type="checkbox"/> PEPSI TWIST LIGHT                 |
| <input type="checkbox"/> PEPSI TWIST                | <input type="checkbox"/> ARANCATA SANBENEDETTO          | <input type="checkbox"/> ORANSCODA                         |
| <input type="checkbox"/> LEMON SODA                 | <input type="checkbox"/> BACARDI BREZZER                |                                                            |

• **Taking medications (in the last 24 hours):**

☐ LAEVLAC (ROCHE S.p.A.)

---

**Environmental exposure levels (living and working environment):**

➤ HOME LOCATED IN AN AREA:

☐ MAINLY RURAL ☐ WITH MEDIUM-INTENSIVE TRAFFIC ☐ WITH HIGH-INTENSITY TRAFFIC

➤ TRAVEL HOME-WORKPLACE

☐ TRANSPORTATION (CAR, MOTORCYCLE OR PUBLIC) \_\_\_\_\_ ☐ TIME (MIN.) \_\_\_\_\_ ☐ DISTANCE (km) \_\_\_\_\_

➤ EXTRA-WORKING ACTIVITIES CARRIED OUT THE PREVIOUS DAY OR THE SAME DAY OF THE URINE COLLECTION: \_\_\_\_\_

HAVE BEEN USED CHEMICAL SUBSTANCES ☐ YES ☐ NO IF YES TO SPECIFY WHICH: \_\_\_\_\_

---

The employee  
\_\_\_\_\_

BIOLOGICAL MONITORING OF THE PROFESSIONAL EXPOSURE TO BENZENE

BIOLOGICAL MONITORING OF THE PROFESSIONAL EXPOSURE TO BENZENE

**Figure S1.** Questionnaire to assess the non-occupational exposure to benzene confounding factor.
